# Supplementary material for: Rootstock effects on scion gene expression in maritime pine
Source: PubMed Central journal article supplement (PMC8173007; doi:10.1038/s41598-021-90672-y), 2021-06-02
Supplement: 41598_2021_90672_MOESM1_ESM.pdf [file 41598_2021_90672_MOESM1_ESM.pdf]

# Supplementary Fig. S1. Validation of sequencing data by qRT-PCR

**a**

| Gene                                                  | Code    | Transcript ID | Forward primer          | Reverse primer          |
|-------------------------------------------------------|---------|---------------|-------------------------|-------------------------|
| DREB transcription factor                             | DREB    | umigene20075  | CTCATCCCAGAAAACGTCGG    | TACCAATACTCCGGGGTGG     |
| pre-mRNA-processing protein                           | LUC7    | isotig26861   | TTTTGACATGGGCAGTTGCG    | TGAGCAGAAGTGAACGAGAG    |
| Outer mitochondrion membrane TOM translocation system | TOM     | isotig128281  | TGAGGAGCGTACTTCCGAAT    | TCGATTGAGCAAGGGATTGCC   |
| C2H2-ZF transcription factor                          | C2H2-ZF | umigene16552  | GCCCAACTTCAGGTAAGGCA    | CTTTCCTCCCCCTCTGCTTG    |
| Macrophage migration inhibitory factor                | MIF     | umigene209604 | TGTGACTACAACAACCTAGTTCA | ATGTCAAAGTGGCACCACATTTT |
| Ri18S                                                 |         |               | GCGAAAGCATTTGCCAAGG     | ATTCCTGGTCGGCATCGTTTA   |

**b**

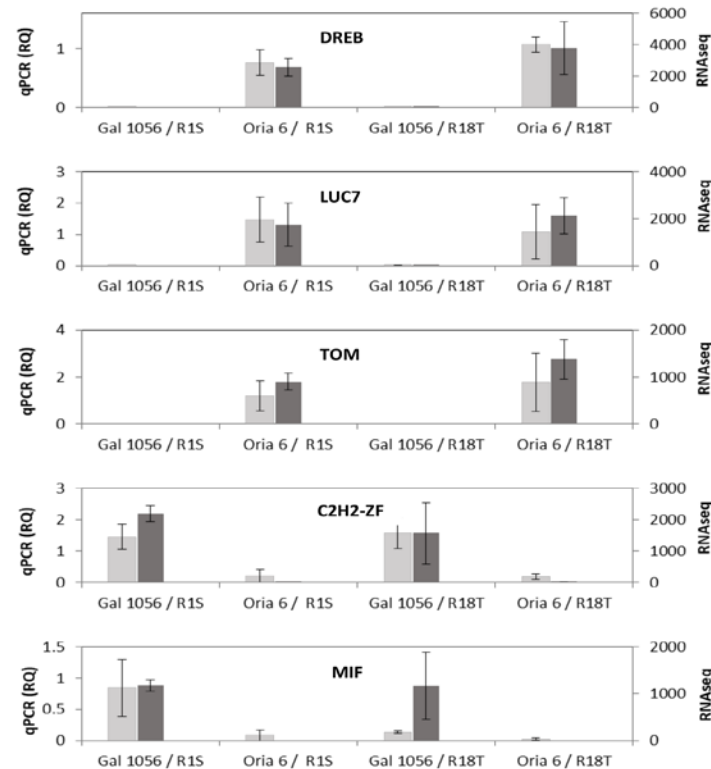

**(a)** Primer sequences for qRT-PCR. **(b)** Relative quantification (RQ) by qRT-PCR (grey bars) and RNA-Seq normalized expression values (black bars) of five DEGs: DREB TF (DREB), pre-mRNA-processing protein (LUC7), outer mitochondrion membrane TOM translocation system (TOM), C2H2-ZF TF (C2H2-ZF), and macrophage migration inhibitory factor (MIF)
