# Supplementary material for: Rootstock effects on scion gene expression in maritime pine
Source: PubMed Central journal article supplement (PMC8173007; doi:10.1038/s41598-021-90672-y), 2021-06-02
Supplement: 41598_2021_90672_MOESM2_ESM.pdf [file 41598_2021_90672_MOESM2_ESM.pdf]

## Supplementary Fig. S2. GO terms enriched in common DEGs between G/S vs O/S and G/T vs O/T

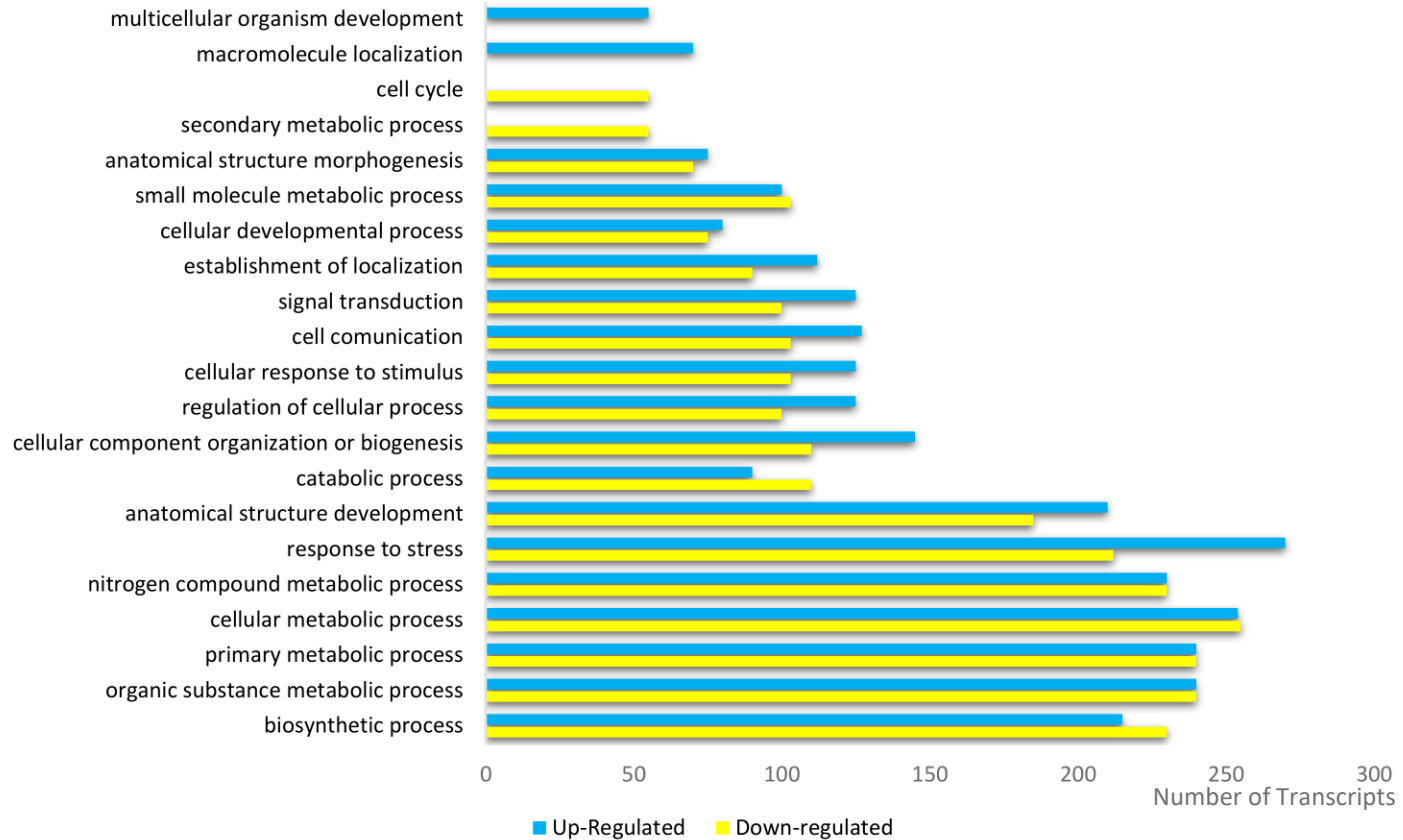

Histogram presentation of GO terms enriched in significantly upregulated (blue) and downregulated (yellow) common DEGs between G/S vs O/S and G/T vs O/T.
