# Supplementary material for: Rootstock effects on scion gene expression in maritime pine
Source: PubMed Central journal article supplement (PMC8173007; doi:10.1038/s41598-021-90672-y), 2021-06-02
Supplement: 41598_2021_90672_MOESM3_ESM.pdf [file 41598_2021_90672_MOESM3_ESM.pdf]

**Supplementary Table 1. Summary of *Pinus pinaster* sequencing data trimming, number of mapped reads**

| <b>Genotype</b>                                              | <b>Oria 6/R1S</b> |          |          | <b>Gal 1056/R1S</b> |          |          | <b>Gal 1056/R18T</b> |          |          | <b>Oria 6/R18T</b> |           |           |
|--------------------------------------------------------------|-------------------|----------|----------|---------------------|----------|----------|----------------------|----------|----------|--------------------|-----------|-----------|
| <b>Library Number</b>                                        | <b>1</b>          | <b>2</b> | <b>3</b> | <b>4</b>            | <b>5</b> | <b>6</b> | <b>7</b>             | <b>8</b> | <b>9</b> | <b>10</b>          | <b>11</b> | <b>12</b> |
| <b>Raw reads (Mb)</b>                                        | 13.23215          | 12.65581 | 13.00199 | 15.99188            | 14.89687 | 16.95577 | 22.64033             | 12.65853 | 16.14964 | 16.05427           | 26.35359  | 28.38755  |
| <b>Average Length</b>                                        | 75.51             | 75.52    | 75.54    | 75.52               | 75.52    | 75.53    | 75.52                | 75.56    | 75.55    | 75.53              | 75.52     | 75.53     |
| <b>Average Quality</b>                                       | 33.89             | 34.45    | 34.40    | 34.27               | 34.52    | 34.45    | 34.45                | 34.33    | 34.31    | 34.36              | 34.42     | 34.45     |
| <b>Reads after reformat.sh and Sortmerna processing (Mb)</b> | 11.77858          | 11.62967 | 7.17227  | 12.50118            | 13.12024 | 10.90749 | 19.52082             | 4.90925  | 7.62297  | 11.48367           | 24.15501  | 22.23719  |
| <b>Average Length after processing</b>                       | 73                | 73       | 73       | 73                  | 73       | 73       | 73                   | 73       | 73       | 73                 | 73        | 73        |
| <b>Number of mapped reads (Mb)</b>                           | 10.92487          | 10.68927 | 6.512493 | 11.37022            | 12.34044 | 10.11667 | 17.87468             | 4.19261  | 6.83618  | 10.56037           | 22.596    | 20.49219  |
